# Supplementary material for: Evaluate the immune-related eRNA models and signature score to predict the response to immunotherapy in thyroid carcinoma
Source: Cancer Cell Int. 2022 Oct 10;22:307. doi: 10.1186/s12935-022-02722-8 (PMC9549686; doi:10.1186/s12935-022-02722-8)
Supplement: Supplementary file 3 — Additional file 3: Table S1. Premier sequences for qRT-PCR analysis. [file 12935_2022_2722_MOESM3_ESM.xlsx]

## Sheet: Sheet1
Supplementary Table 1：Premier sequences for qRT-PCR analysis.
Premier	Sequences (5'-3')
TP73-AS1-F	CCAGGTTCAAGCGATTCT
TP73-AS1-R	ATCACGAGGTCAGTAGTTC
FAAHP1-F	TTGGCTTCTTGGCTATCTG
FAAHP1-R	CACTTGGCTATGAACTCTTG
WDFY3-AS2-F	CTAAGGACACAGCAAGAGG
WDFY3-AS2-R	TCAAGGTGCCAGGAGATT
AL365259.1-F	GGTAACTTGCTCCTGATGT
AL365259.1-R	TGAGTGGATAGAGTGATGTG
LINC01184-F	AGACCTAGATTGGCATAACC
LINC01184-R	TCTCACCTTGGAACATCAG
TMEM184A-F	TCCTCAAGTTCCTCACCAT
TMEM184A-R	TCTCCACGCAGATGATGA
AC007255.1-F	CCTCCTTGATGGTCTAACTAA
AC007255.1-R	AACACTTGATCTCCTCTTCC
IQANK1-F	GAGCGGTGTGGAAGTATG
IQANK1-R	GCCTCTGTGTCCTTGATG
AC084375.1-F	AACAACCATCAACCTCCTTA
AC084375.1-R	CTGCTCTGCCACTAACTC
GAPDH-F	GTCTCCTCTGACTTCAACAGCG
GAPDH-R	ACCACCCTGTTGCTGTAGCCAA
