# Supplementary material for: Evaluate the immune-related eRNA models and signature score to predict the response to immunotherapy in thyroid carcinoma
Source: Cancer Cell Int. 2022 Oct 10;22:307. doi: 10.1186/s12935-022-02722-8 (PMC9549686; doi:10.1186/s12935-022-02722-8)
Supplement: Supplementary file 4 — Additional file 4: Table S2. The differentially expressed genes between high and low-risk group. [file 12935_2022_2722_MOESM4_ESM.xlsx]

## Sheet: Sheet1
Supplementary Table 2: The differentially expressed genes between high and low-risk group.
Gene	lowMean	highMean	logFC	p-Value	FDR
GAP43	7.69071	3.7767	-1.02599	4.31679e-12	4.0654e-11
NPPC	0.613308	1.42019	1.2114	0.0028801	0.0049218
SLC14A2	0.653712	1.67224	1.35506	0.0100509	0.0155512
PSAT1	3.7732	9.627	1.3513	2.53796e-15	5.10794e-14
MPPED2	0.790344	2.74125	1.79428	2.92877e-15	5.81299e-14
IGKV5-2	3.01563	1.20833	-1.31944	0.000878833	0.00164666
RNF157-AS1	0.676137	1.5369	1.18464	7.97293e-13	9.04462e-12
PKHD1L1	0.835326	6.91252	3.0488	2.77277e-16	7.26712e-15
ARHGAP24	1.7566	3.85711	1.13473	1.63946e-10	1.04713e-09
KRT14	2.19062	0.797278	-1.45818	1.58709e-05	4.07203e-05
TNFRSF11B	8.9229	19.6132	1.13624	8.45877e-12	7.38984e-11
IGHV4-59	83.3313	41.0626	-1.02103	1.94789e-05	4.91096e-05
CYP27B1	1.11171	2.35435	1.08255	1.77047e-08	7.7943e-08
IYD	43.9518	117.693	1.42104	1.47668e-17	5.53048e-16
KRT17	21.0175	9.35947	-1.16709	9.45696e-07	3.0336e-06
AC012038.2	2.96283	0.97545	-1.60284	1.2917e-19	9.32407e-18
GRIN2C	1.24682	3.41314	1.45285	8.58919e-08	3.32378e-07
ARHGEF28	0.958182	2.04326	1.0925	1.30652e-17	4.9798e-16
IGHV1-46	43.552	14.927	-1.54481	0.000621092	0.00119103
ELMO1	3.17606	8.02234	1.33678	6.9629e-09	3.29914e-08
KRT5	3.73086	0.714415	-2.38468	0.00103337	0.00191155
IGKV1-12	4.51554	1.70676	-1.40364	2.81698e-06	8.28926e-06
ALK	2.32618	0.443515	-2.39091	2.36041e-07	8.42044e-07
LTB	9.67146	4.06222	-1.25147	1.20558e-14	2.04694e-13
CD1E	1.94955	0.953462	-1.03189	4.85231e-13	5.78116e-12
MT1G	124.173	612.249	2.30176	2.39488e-08	1.02976e-07
AC244502.3	1.8757	0.78145	-1.2632	1.62902e-15	3.45058e-14
GRAMD2A	0.843704	1.83539	1.12128	3.34615e-08	1.39156e-07
HKDC1	1.05221	2.37044	1.17173	5.68503e-11	4.04941e-10
KCNAB1	4.31032	10.5025	1.28486	7.07739e-07	2.31922e-06
TRBC2	10.6263	5.06474	-1.06908	2.50797e-12	2.514e-11
HLF	2.23928	4.69018	1.06661	8.35059e-12	7.31512e-11
IGKV1-6	63.9851	14.3569	-2.15599	4.44735e-05	0.000105265
AL355607.1	0.590038	1.54558	1.38927	1.97114e-13	2.58045e-12
APOC1	98.3797	42.554	-1.20907	4.34921e-18	1.88578e-16
APOA1	0.88425	5.47461	2.63023	1.87343e-06	5.693e-06
CKM	1.91735	0.48799	-1.97419	5.26226e-07	1.76332e-06
MT1F	26.075	96.4509	1.88713	1.56072e-09	8.39552e-09
IGKV1-16	31.7597	14.0649	-1.1751	4.51736e-06	1.28086e-05
IGKV2-24	15.8671	5.85463	-1.43838	1.99446e-05	5.02248e-05
IGHV2-70D	8.1039	1.55396	-2.38266	1.18067e-06	3.71539e-06
MIR621	10.0338	34.9522	1.80052	4.54665e-19	2.65825e-17
AC078899.3	1.92058	3.852	1.00407	1.72673e-13	2.28413e-12
IGKV3D-15	7.97461	2.54681	-1.64672	4.95533e-05	0.000116393
IGHV1-12	6.20872	1.50749	-2.04215	0.000159652	0.000340969
TFCP2L1	1.6662	5.6418	1.75959	9.7174e-14	1.353e-12
DGKI	0.649801	2.48516	1.93527	1.4202e-14	2.35866e-13
PWWP3B	1.30427	2.80492	1.10472	2.74795e-11	2.12231e-10
CD79A	17.7304	6.87834	-1.36609	1.08851e-06	3.44806e-06
KHDRBS2	0.897701	2.34434	1.38487	4.0617e-09	2.00924e-08
IGHV3-19	1.60479	0.689274	-1.21924	0.000466525	0.000915827
HLA-DQB2	25.8358	12.5097	-1.04632	7.41086e-14	1.05691e-12
AC106795.2	0.74648	1.83204	1.29527	6.93831e-15	1.25035e-13
LINC01886	3.75245	9.10775	1.27926	2.6543e-13	3.35251e-12
IGKV1D-27	1.61129	0.59691	-1.43263	0.000250784	0.000516055
IGLV3-19	105.09	50.4965	-1.05737	8.20676e-05	0.00018477
ADM2	3.84576	8.93172	1.21567	1.06939e-20	1.15147e-18
SGCD	0.975459	2.95312	1.59809	6.09734e-11	4.29808e-10
IGKV1D-13	4.54343	1.71704	-1.40385	0.000604189	0.00116102
IGKV1D-12	2.14652	0.601368	-1.83568	0.00223514	0.00389957
IGHV1-2	79.1677	28.5519	-1.47133	0.000159597	0.000340908
PLA2R1	1.73543	4.17856	1.26771	1.78611e-12	1.86416e-11
SLC26A4-AS1	32.2178	104.986	1.70427	1.50844e-07	5.56714e-07
IVL	4.31693	1.91755	-1.17074	3.28316e-12	3.20164e-11
TRBV28	5.26473	2.42233	-1.11996	6.36786e-12	5.74575e-11
CYP4F32P	1.56554	4.35159	1.47488	8.12878e-13	9.18915e-12
CWH43	0.716564	3.36814	2.23279	2.47458e-11	1.92615e-10
IGLV5-45	9.92791	3.89039	-1.35158	4.90875e-06	1.38243e-05
LGI3	2.68713	6.20119	1.20648	2.28481e-11	1.79465e-10
CDH16	2.64446	8.17386	1.62805	1.06711e-07	4.05651e-07
IGF2	40.6628	3.05535	-3.7343	2.33032e-05	5.80379e-05
RAG2	0.0940695	1.98607	4.40005	1.12675e-10	7.46219e-10
LINC02861	0.640745	1.48406	1.21173	4.18878e-20	3.67794e-18
IGKV3-7	4.77233	1.94653	-1.29379	2.29519e-05	5.7185e-05
AC007405.4	1.05057	2.43447	1.21243	2.31237e-16	6.23761e-15
IGLV7-43	14.1373	6.22014	-1.18449	0.000255242	0.000524238
ZMAT4	0.565101	3.32297	2.55589	5.30689e-13	6.23934e-12
IGHV5-51	82.7913	31.9835	-1.37215	3.09568e-05	7.52999e-05
PEG3	0.825776	1.7485	1.0823	2.22647e-21	3.2154e-19
IGLV8-61	35.62	15.945	-1.15958	0.000196215	0.000412645
G0S2	35.8941	14.5166	-1.30604	2.53077e-22	5.2742e-20
CLDN2	5.62653	2.70783	-1.05511	6.00049e-14	8.7213e-13
IGKV6D-21	5.2151	1.07872	-2.27338	0.000209764	0.000438499
SYT12	11.149	5.13176	-1.11938	1.66175e-19	1.16062e-17
LRP2	4.34083	10.5763	1.2848	9.08822e-22	1.58688e-19
IGLV7-46	18.6519	8.603	-1.11641	0.000248013	0.000510935
HSD17B6	8.58626	17.418	1.02048	6.44539e-08	2.54994e-07
BTBD11	2.44881	5.29393	1.11226	7.79614e-12	6.87135e-11
VGF	4.97334	1.85478	-1.42296	0.00102718	0.00190037
BATF	3.22009	1.60401	-1.00541	1.52963e-12	1.61473e-11
CHI3L1	167.339	77.9646	-1.10188	9.88877e-15	1.72201e-13
SOD3	18.8736	44.4756	1.23665	1.00051e-06	3.18885e-06
IGKV2D-24	1.5931	0.484275	-1.71793	0.0029174	0.00497765
IGLV3-9	13.826	3.83796	-1.84897	1.67654e-05	4.27692e-05
HAS2	1.48469	0.530826	-1.48385	4.10406e-13	4.99327e-12
SLC24A3	0.796972	1.76736	1.149	1.88522e-15	3.92885e-14
PDZRN4	4.92048	2.25212	-1.12751	1.634e-13	2.1721e-12
IGKV1-8	4.99258	2.14147	-1.22118	1.79472e-05	4.55234e-05
IGLC7	13.6554	3.55068	-1.94331	2.9372e-06	8.61948e-06
LINC00092	0.79089	1.59474	1.01178	0.00527976	0.00858002
TRPC5	3.85014	1.91411	-1.00824	2.07762e-11	1.64491e-10
PPARGC1A	1.27432	3.28109	1.36445	9.76202e-22	1.6818e-19
TPO	60.6848	314.622	2.37421	2.31878e-13	2.96937e-12
IGKV1D-39	5.62172	1.42689	-1.97814	0.000365473	0.00073089
IGKV6-21	6.40622	2.33886	-1.45367	4.75143e-05	0.000111929
IGHGP	69.6802	23.4523	-1.57102	6.13437e-05	0.00014154
MYCL	0.982916	2.16574	1.13972	2.60861e-10	1.6058e-09
IGKV2-30	3.89541	1.71457	-1.18393	9.97454e-05	0.000221281
IGHV3-74	34.184	12.1932	-1.48725	3.67252e-05	8.80874e-05
SLC5A8	2.16193	8.57945	1.98857	8.65624e-11	5.86817e-10
CD207	4.91682	2.19972	-1.16041	2.75568e-12	2.73053e-11
IGKV1OR22-1	2.35969	0.659902	-1.83827	0.00081898	0.0015428
IGHV1-18	121.797	41.6241	-1.54899	2.1441e-05	5.37209e-05
SLC4A4	1.49051	5.80025	1.9603	4.11755e-20	3.66916e-18
IGHV1-45	1.93399	0.70091	-1.46428	0.000331134	0.000667485
SMAD9	4.56895	9.44193	1.04722	3.71653e-21	4.85064e-19
AC007255.1	5.83061	2.50289	-1.22005	9.48921e-16	2.15105e-14
SERTM1	0.284208	2.30584	3.02027	4.56216e-17	1.50761e-15
HLA-DOA	14.5071	6.79346	-1.09454	1.8254e-13	2.40183e-12
HGD	3.59226	11.3392	1.65836	1.82012e-10	1.1534e-09
IGLV9-49	11.9332	4.15974	-1.52042	4.07213e-05	9.70237e-05
IGHJ2	11.5765	5.682	-1.02673	0.000895547	0.00167531
IGKV1D-17	3.75543	0.628966	-2.57792	0.000167416	0.00035608
SLC19A1	0.700642	1.41405	1.01309	3.06996e-09	1.55192e-08
IGHV3-11	50.2646	21.6873	-1.21269	0.000236257	0.000488897
TAGLN3	1.46588	0.563053	-1.38042	1.98151e-05	4.99135e-05
CHGB	11.3294	4.14404	-1.45096	3.3155e-05	8.01488e-05
IGHD	7.87217	3.73792	-1.07453	6.61262e-06	1.81868e-05
ANKRD22	1.88277	0.874739	-1.10593	1.60781e-15	3.41685e-14
IGHV3-72	26.3964	3.60294	-2.87309	6.37932e-05	0.000146772
FIBCD1	2.12424	0.786097	-1.43417	2.07648e-13	2.69941e-12
IGKV3D-20	19.755	6.43385	-1.61846	3.28277e-05	7.94766e-05
PRSS2	18.9079	8.54013	-1.14666	6.44931e-16	1.52343e-14
IGKV3D-11	5.89336	1.76511	-1.73934	0.00109562	0.00201775
IGKJ5	5.79302	2.57227	-1.17127	0.000288963	0.000589003
GJB6	1.0367	2.61788	1.3364	3.42918e-08	1.42197e-07
LGALS2	2.46922	1.19443	-1.04773	1.4027e-13	1.88991e-12
S100B	7.90595	3.45438	-1.19451	6.29666e-16	1.49557e-14
IGHG1	912.521	344.857	-1.40386	7.55587e-06	2.05276e-05
TPSB2	1.59214	0.698484	-1.18867	3.9403e-11	2.92769e-10
IGHV4-39	130.401	48.8462	-1.41664	5.87968e-06	1.6359e-05
SEMA3D	0.697052	5.9757	3.09977	6.94034e-14	9.97509e-13
TMEM171	3.48857	7.69583	1.14144	1.04345e-08	4.76914e-08
IGHG4	527.915	232.907	-1.18055	0.00924134	0.0143916
CNTFR	1.91026	4.06014	1.08776	0.0188718	0.0275746
IGHV6-1	5.17281	1.31959	-1.97086	7.41773e-05	0.000168473
CLCNKA	0.83446	2.51882	1.59383	3.51382e-12	3.40856e-11
GLDC	0.44697	2.3232	2.37786	6.22421e-06	1.72138e-05
SLC7A11	0.721955	1.54029	1.09323	4.36355e-11	3.21445e-10
SIGLEC15	2.0374	0.960765	-1.08448	2.6012e-16	6.87324e-15
IGKV3-15	90.4479	36.6054	-1.30503	4.08702e-05	9.73248e-05
IGHA2	101.257	36.4937	-1.4723	2.19466e-06	6.5901e-06
JCHAIN	92.6828	45.1887	-1.03634	1.38827e-05	3.60124e-05
CXCL2	16.2522	8.07939	-1.00832	4.35878e-09	2.14307e-08
PCED1B-AS1	2.14421	1.07034	-1.00238	6.8114e-14	9.83352e-13
SLC27A4	9.14551	19.6807	1.10565	3.72747e-10	2.23596e-09
IGHV1-58	4.30953	1.90725	-1.17603	2.27314e-05	5.67449e-05
DPY19L2	0.968499	2.02691	1.06546	1.03601e-15	2.32805e-14
BMP8A	1.27747	7.8877	2.62632	2.75818e-08	1.16733e-07
SLC25A15	3.03652	8.8867	1.54923	5.29345e-20	4.47037e-18
IGLL5	36.5969	11.6552	-1.65075	9.10705e-07	2.92665e-06
RAMP1	10.7118	5.10565	-1.06903	6.18828e-17	1.97429e-15
IFTAP	6.55367	13.1502	1.00472	3.22404e-13	3.97878e-12
RIMS4	1.12118	2.78916	1.31482	3.84837e-08	1.58057e-07
IGLV1-44	89.6358	41.4285	-1.11345	1.39437e-05	3.61635e-05
SCGB2A1	2.07225	4.21364	1.02387	3.0508e-11	2.33251e-10
IGLV1-36	4.75573	2.30615	-1.04418	0.000644401	0.00123281
TNFRSF17	2.02263	0.829628	-1.28569	0.00906507	0.0141427
AC006058.1	2.72013	5.61343	1.0452	4.09582e-14	6.14658e-13
IQGAP2	3.42529	7.98299	1.2207	1.82621e-17	6.66567e-16
IGHV1OR15-9	2.35282	0.929472	-1.33991	0.000690199	0.00131515
CSGALNACT1	6.31929	12.7588	1.01365	8.04374e-19	4.24217e-17
IGLV2-8	57.2287	15.0054	-1.93126	0.000192606	0.000405623
IGLV2-18	8.21295	3.30453	-1.31345	0.000115362	0.000252857
IGHV2-5	10.8593	3.81826	-1.50795	0.000603684	0.00116023
IGHV1-69	32.3089	6.67401	-2.27531	4.37467e-05	0.000103716
KIT	2.3052	9.49942	2.04295	5.19572e-13	6.13095e-12
C1QL2	1.4891	0.55971	-1.41169	1.52499e-09	8.2342e-09
IGLV1-51	150.303	53.1415	-1.49997	1.44784e-05	3.73851e-05
LINC01789	2.55849	8.28668	1.6955	1.01202e-09	5.67561e-09
IGLV2-23	127.603	52.0343	-1.29412	2.61476e-05	6.42795e-05
IGHV1-3	5.01584	1.60401	-1.64481	0.000254672	0.000523317
IGKV1-9	57.0904	21.8729	-1.38411	0.000111406	0.000244725
WDR72	3.31382	7.38181	1.15548	4.18007e-17	1.39562e-15
IGLV6-57	29.5205	9.13646	-1.69201	2.38746e-05	5.93009e-05
IP6K3	1.13264	3.53488	1.64197	1.13658e-15	2.51038e-14
KCNK2	0.808911	2.29165	1.50234	4.89099e-12	4.53021e-11
CD1A	4.06532	1.77337	-1.19687	2.35899e-12	2.39439e-11
IGLC3	256.578	76.5358	-1.74519	2.28288e-06	6.84227e-06
IGKV1D-8	4.26643	1.82923	-1.22179	4.36177e-06	1.24192e-05
FABP4	4.36911	10.2352	1.22813	1.68837e-06	5.17689e-06
IGHG3	194.075	73.9751	-1.3915	1.00609e-05	2.66606e-05
NCAM1	2.47292	4.95385	1.00234	2.89121e-09	1.46672e-08
EDN3	5.40663	10.9082	1.01262	2.67462e-06	7.90096e-06
IGHV4-4	6.37672	2.72334	-1.22744	0.000335543	0.000675319
IGLV10-54	8.58627	3.44164	-1.31893	6.15472e-05	0.000141984
TFF3	37.2457	137.259	1.88176	3.7007e-09	1.84123e-08
IGHV4-34	52.7512	24.9732	-1.07882	7.45715e-05	0.000169309
MIOX	1.95282	5.01944	1.36197	5.52052e-08	2.2077e-07
IGLV3-21	136.216	34.4317	-1.98408	6.74399e-06	1.85205e-05
ERO1B	3.33691	6.83283	1.03397	1.38648e-21	2.21169e-19
PPARG	1.51171	4.02568	1.41305	0.000620113	0.00118933
RNU4-2	6.75027	3.26068	-1.04977	0.000681554	0.0013006
WNT4	0.62613	1.91056	1.60946	1.51612e-12	1.60309e-11
SLC26A7	16.1528	48.6878	1.59178	2.63087e-17	9.33886e-16
CILP	1.01949	2.08346	1.03114	0.00107295	0.00197909
UGT8	0.884838	2.21738	1.32537	1.63208e-15	3.45142e-14
SLAMF7	3.57064	1.70685	-1.06485	3.81442e-07	1.3136e-06
FCER1A	5.77276	2.69527	-1.09883	2.25576e-13	2.89154e-12
IGHV4-31	33.3884	10.2654	-1.70156	2.02956e-05	5.10392e-05
IGLV1-40	163.752	60.9828	-1.42504	1.37611e-05	3.57682e-05
MT1M	2.87874	6.96908	1.27553	6.76254e-05	0.00015479
CXCL13	8.43972	3.52197	-1.26081	0.00100593	0.0018648
ERICH2	0.896358	2.19889	1.29463	1.64247e-08	7.27043e-08
SPX	1.34187	4.50073	1.74592	1.30663e-16	3.82835e-15
IGKV1OR2-6	3.17746	0.991111	-1.68076	3.56247e-05	8.57022e-05
PLAU	83.8477	38.3875	-1.12713	5.05274e-19	2.86344e-17
SLC5A5	1.80002	5.69197	1.66091	0.00172758	0.00307404
MCEMP1	1.65009	0.753074	-1.13168	1.07832e-11	9.1906e-11
S100A2	29.5771	14.3132	-1.04713	2.27226e-09	1.1758e-08
AC244502.1	1.83002	0.767413	-1.25379	1.84455e-16	5.14761e-15
IGHV3OR16-9	1.62228	0.656994	-1.30407	0.00848308	0.0133102
GNA14	3.02449	6.90208	1.19034	9.46709e-15	1.65527e-13
IGHV3-7	4.24723	1.34346	-1.66057	2.33456e-05	5.81324e-05
IGHV4-55	5.68481	2.17627	-1.38526	7.70061e-05	0.000174285
IGLV2-14	262.143	65.2192	-2.00698	9.12769e-06	2.43978e-05
AC062015.1	1.32088	3.83285	1.53691	1.08047e-07	4.10491e-07
TRDJ2	1.44264	0.63734	-1.17858	1.20511e-08	5.46358e-08
FCGBP	26.9319	57.8101	1.102	5.69144e-12	5.17881e-11
IGKV1-5	156.292	68.494	-1.19019	5.90557e-06	1.6427e-05
IGFBP6	209.229	83.9052	-1.31825	1.17038e-26	1.37478e-23
IGKV3-20	444.189	141.309	-1.65232	1.65985e-05	4.23767e-05
IGHV3-53	17.1491	5.71141	-1.58621	8.0614e-05	0.000181783
IGHV4-28	10.9796	3.65087	-1.58852	1.1139e-05	2.93246e-05
TRIB3	4.66186	13.8911	1.57519	0.00398567	0.00661854
SYNDIG1	1.04009	2.18623	1.07174	3.73335e-06	1.07508e-05
IGKV4-1	227.871	78.6111	-1.53541	1.44172e-05	3.72568e-05
LINC01871	2.02954	0.957122	-1.08437	5.3519e-12	4.90439e-11
DIO2	21.3731	48.0967	1.17014	5.0199e-12	4.63964e-11
CLCNKB	1.67416	3.65219	1.12532	1.14413e-10	7.55794e-10
IGHV3-21	56.6236	21.0723	-1.42605	0.000107291	0.00023653
AF131216.3	0.821569	3.3848	2.04262	3.17375e-16	8.18523e-15
LINC02568	2.9142	5.9729	1.03533	1.62561e-05	4.1626e-05
IGKV2OR22-4	3.21299	0.787614	-2.02836	4.85381e-05	0.000114154
SELENOV	0.614207	2.20334	1.84289	6.37455e-12	5.74777e-11
AL157871.6	3.70052	8.16103	1.14102	6.36825e-10	3.67832e-09
IGHV1OR15-2	4.51407	1.26537	-1.83487	7.62054e-05	0.000172746
IGHV3-15	71.6442	25.8786	-1.46909	3.86289e-05	9.23449e-05
ESPN	2.80288	1.27685	-1.13432	1.34535e-17	5.11274e-16
IGHV1-69D	37.9274	14.1328	-1.42419	4.99362e-06	1.40419e-05
IGKV3-11	224.379	81.1586	-1.46712	1.38042e-05	3.58542e-05
IGKV1-27	37.4628	17.8234	-1.07169	2.58303e-05	6.36084e-05
NELL2	45.0165	21.7355	-1.0504	2.91435e-15	5.79329e-14
MT1H	12.8077	76.6225	2.58076	1.90659e-05	4.81341e-05
SLC29A4	1.15269	2.52424	1.13084	2.34314e-11	1.83378e-10
DIO1	17.8641	69.2752	1.95528	2.36857e-09	1.21978e-08
AC092645.1	0.790339	1.60759	1.02435	3.46159e-16	8.78727e-15
GLDN	3.29079	1.5246	-1.11	7.16055e-17	2.25113e-15
FAM167A	7.34868	24.6268	1.74467	4.12293e-13	5.01152e-12
CD3D	6.58705	3.0962	-1.08914	1.0155e-12	1.1186e-11
NPY	0.944872	10.6558	3.49538	0.00664462	0.0106138
MARCO	8.57577	4.27402	-1.00467	9.25984e-11	6.24134e-10
HLA-DQA1	23.2023	11.0946	-1.0644	1.46884e-14	2.43007e-13
POU2AF1	1.87142	0.909963	-1.04025	2.20608e-05	5.51775e-05
ITPR1	3.09245	6.79867	1.1365	1.22683e-11	1.02934e-10
FAM234B	1.34991	2.71015	1.00551	1.12475e-16	3.37191e-15
TDRD9	1.08998	2.62089	1.26575	1.99238e-13	2.60036e-12
OGDHL	3.52111	8.28285	1.2341	2.46142e-19	1.59819e-17
IGHV3OR16-13	1.54614	0.529714	-1.54539	8.10661e-06	2.19271e-05
IGHV3-43	7.30253	3.34545	-1.12619	0.000724886	0.00137759
RAP1GAP	17.5864	41.6084	1.24241	4.44668e-19	2.61162e-17
FHL1	20.9407	50.5117	1.27031	8.76054e-13	9.80892e-12
GLT8D2	2.5082	5.11061	1.02684	0.00990881	0.0153589
GPR83	0.701303	1.5279	1.12344	1.7166e-09	9.14268e-09
WSCD2	0.975707	4.3644	2.16126	1.54297e-09	8.31387e-09
IGHG2	682.841	235.271	-1.53723	4.65139e-05	0.000109693
SCUBE3	5.66757	12.7433	1.16893	1.43848e-08	6.42469e-08
IL4I1	3.02743	1.44023	-1.0718	2.90246e-13	3.63046e-12
CRABP1	17.9133	49.3043	1.46068	1.22506e-06	3.8383e-06
IGKV1-17	63.7645	25.3705	-1.3296	2.33939e-05	5.82189e-05
IL2RG	9.37117	4.61419	-1.02215	9.5814e-13	1.06267e-11
AC034243.1	0.901738	1.87117	1.05316	5.23974e-08	2.10649e-07
AL031710.1	1.66348	4.51075	1.43916	1.19116e-06	3.74294e-06
AC008897.1	1.0126	2.11857	1.06502	1.54957e-11	1.27043e-10
GPAM	2.18856	4.6275	1.08025	1.2713e-10	8.30456e-10
FDCSP	8.63315	3.48611	-1.30827	0.00273248	0.00469313
TRIM58	1.55411	4.00408	1.36538	1.35634e-20	1.36916e-18
IGKV1-39	7.98091	2.10883	-1.92011	9.2409e-05	0.000206292
EBF4	5.86	13.6931	1.22448	5.17451e-12	4.75871e-11
IGHV4-61	17.4627	3.83104	-2.18847	4.19427e-05	9.9695e-05
IGHV1-67	2.18483	0.667595	-1.71048	0.000714732	0.00135929
CCL19	22.5631	9.19025	-1.29579	5.92251e-07	1.96772e-06
TMEM255A	1.51134	0.5158	-1.55095	2.61702e-17	9.31529e-16
AP006333.1	0.490967	2.07044	2.07624	1.57614e-11	1.28895e-10
KATNAL2	0.969591	2.22283	1.19695	5.6039e-20	4.70181e-18
AL354798.1	0.637092	1.71763	1.43084	1.79047e-10	1.13572e-09
PAIP2B	1.30619	2.7924	1.09614	1.12002e-23	4.13481e-21
AL137026.1	2.62402	1.25397	-1.06527	2.11248e-16	5.79519e-15
TIMP1	605.141	297.675	-1.02353	3.81382e-26	3.0799e-23
IGHV3-66	11.4758	3.85169	-1.57504	0.0156515	0.0232613
IGHV3-23	184.579	61.5537	-1.58432	0.000111256	0.000244479
MATN2	13.1965	31.4852	1.25451	3.8405e-18	1.69362e-16
RETN	1.94528	0.966338	-1.00938	2.12882e-12	2.18826e-11
AC023421.1	1.02753	2.84605	1.46979	0.00017285	0.000366732
IGHV2-26	20.1837	8.1123	-1.31501	4.88043e-05	0.000114738
RBBP8NL	1.64511	3.33106	1.01779	6.25318e-17	1.99008e-15
ABCC8	0.659507	1.59727	1.27615	1.07434e-07	4.08282e-07
IGHV2-70	14.5076	3.7764	-1.94173	7.40082e-07	2.41724e-06
IGHV3-33	50.9261	18.4758	-1.46277	7.12679e-05	0.000162408
IGLV3-1	38.1072	14.0324	-1.4413	7.59894e-06	2.06289e-05
IGHV3-30	86.7344	28.6054	-1.60032	4.96168e-05	0.000116521
IPCEF1	1.03562	3.55125	1.77784	6.64759e-08	2.6203e-07
AC134879.2	1.73494	0.611452	-1.50458	0.002754	0.00472444
IGKV1D-43	1.62451	0.665967	-1.28648	6.58808e-05	0.000151252
IGLV2-11	124.181	36.7468	-1.75676	0.000448827	0.000882962
LINC02672	1.36711	3.38128	1.30644	0.0353525	0.0488337
PVALB	3.92917	1.78054	-1.14191	0.0216806	0.0312861
CDON	1.86021	4.08992	1.13661	1.51184e-14	2.49164e-13
PRTG	0.852065	1.7055	1.00116	1.54272e-21	2.40163e-19
IGLV1-47	73.8837	32.2171	-1.19743	3.25616e-05	7.88916e-05
GZMB	1.99768	0.925481	-1.11005	1.54548e-08	6.8717e-08
C2CD4B	3.20524	1.55388	-1.04455	5.10627e-10	2.99356e-09
IGLV4-69	41.6542	17.5852	-1.2441	1.79427e-05	4.55208e-05
IGKC	1413.15	430.013	-1.71646	1.87343e-06	5.693e-06
IGHV3-48	16.664	7.38754	-1.17357	0.00119566	0.00218838
KIAA1324	1.09789	2.63423	1.26264	0.000134688	0.000292046
APOE	414.797	176.173	-1.23541	5.39705e-18	2.29393e-16
GABRB3	0.620598	1.55177	1.32219	8.97906e-10	5.07517e-09
IGLV1-41	3.48511	1.51313	-1.20367	0.00122987	0.00224611
OTOS	14.358	42.5762	1.5682	1.25029e-07	4.69076e-07
TRDC	27.6163	11.6525	-1.24488	3.81977e-18	1.69025e-16
MZB1	12.4711	4.2513	-1.55262	2.95823e-06	8.6753e-06
IGHA1	940.495	359.875	-1.38592	1.12997e-06	3.56976e-06
CAPSL	1.03265	2.2608	1.13048	9.59887e-06	2.5562e-05
AC006058.4	1.45952	3.37444	1.20915	1.76779e-19	1.20855e-17
SLC26A4	19.9429	55.2604	1.47037	1.54297e-09	8.31387e-09
PRR15	85.616	39.8911	-1.10181	5.67697e-19	3.17542e-17
IGHV3-73	19.1248	7.09533	-1.43051	0.000318173	0.000642762
IGHM	70.5679	28.6873	-1.2986	5.99649e-08	2.38329e-07
IGHJ1	4.46921	1.75532	-1.34829	0.00346384	0.00583296
KRT6A	5.16878	1.07033	-2.27176	0.00135826	0.00246144
AVPR1A	0.751343	2.01906	1.42614	8.67731e-08	3.35687e-07
CD7	2.49633	1.18965	-1.06928	5.04171e-12	4.65313e-11
PPY	0.0482247	9.48606	7.61989	3.36746e-06	9.78435e-06
AL032819.2	0.760876	1.75658	1.20704	7.93479e-06	2.14893e-05
GATA5	0.621705	1.70239	1.45326	3.01118e-12	2.95874e-11
IGLV3-25	39.9604	19.89	-1.00653	3.79553e-05	9.08187e-05
SORBS2	5.36158	13.0155	1.2795	1.19677e-16	3.55481e-15
IGFBPL1	0.836743	3.11452	1.89615	2.72015e-12	2.69739e-11
AC018816.1	3.69142	1.81948	-1.02065	3.59064e-22	7.13765e-20
IGHV3OR15-7	1.51769	0.554716	-1.45206	0.00102332	0.00189404
SPIRE2	0.858633	1.83141	1.09284	1.08923e-15	2.42237e-14
IGHJ3	39.3573	9.50521	-2.04984	5.44196e-05	0.000126992
IGLC2	453.906	144.964	-1.6467	2.14853e-06	6.46359e-06
COL9A3	10.5389	49.4327	2.22974	2.04269e-05	5.13393e-05
